# Supplementary material for: Synthesis, Characterization and in Vitro Evaluation of New Composite Bisphosphonate Delivery Systems
Source: MDPI journal article supplement (doi:10.3390/ijms150916831), 2014-09-22
Supplement: s1 [file s1]

*Note:*

The authors wish to make the following correction to this paper. There is a mistake appeared in Acknowledgments in the name of organization giving the financial support for this research and publication. Acknowledgments should be replaced by a new version:

### **Acknowledgments**

This work was supported by the research programme (Project DEC-2011/03/D/ST5/05793 “Development and characterization of polymer-apatite composite containing selenium and bisphosphonates”) of the National Science Centre of Poland.

We apologize for any inconvenience caused to the readers.
